# Supplementary material for: Utility of collagen-derived peptides as markers of organ injury in patients with acute heart failure
Source: PubMed Central journal article supplement (PMC7174059; doi:10.1136/openhrt-2019-001041), 2020-04-05
Supplement: openhrt-2019-001041supp001.pdf [file openhrt-2019-001041supp001.pdf]

1

**SUPPLEMENTAL MATERIAL**

2

3 **The utility of collagen-derived peptides as markers of organ injury in patients with acute**  
4 **heart failure: A prospective cohort study**

5 Nagao et al. Collagen markers in acute heart failure

6

7 Kazuya Nagao, MD, PhD; Akinori Tamura, MD; Yukihiro Sato, MD, PhD; Reo Hata, MD;

8 Yuichi Kawase, MD; Kazushige Kadota, MD, PhD; Takahiro Horie, MD, PhD; Naoya Sowa;

9 Masataka Nishiga, MD, PhD; Koh Ono, MD, PhD; Tsukasa Inada, MD, PhD; Masaru Tanaka,

10 MD, PhD

11

12

13

## 1 **Supplemental Methods**

### 2 **Participating centers**

3 Osaka Red Cross Hospital, Osaka, Japan,

4 Hyogo Prefectural Amagasaki General Medical Center, Amagasaki, Japan,

5 Kurashiki Central Hospital, Kurashiki, Japan

### 6 **Measurements of markers**

7 We used commercially available radioimmunoassay kits for PIIINP (CIS Bio International,  
8 Codolet, France) and P4NP 7S (Sceti Medical Labo, Tokyo, Japan) assays; the lower limits of  
9 detection for PIIINP and P4NP 7S were 0.2 U/mL and 1.25 ng/mL, respectively, and the  
10 coefficient of variation was <5%. When necessary, the serum was stored at  $\leq -30^{\circ}\text{C}$  until  
11 assayed following the established protocol used in the clinical setting. Based on the nationwide  
12 standardization of laboratory measurements for medical care in Japan (Multianalyte  
13 Conventional Reference Material [MacRM]),<sup>17</sup> the following were used as cutoff values of  
14 normal LFTs: total bilirubin (T-Bil), 1.5 mg/dL; aspartate aminotransferase (AST), 30 IU/L;  
15 alkaline phosphatase (ALP), 322 IU/L;  $\gamma$ -glutamyltransferase ( $\gamma$ -GTP), 64 IU/L in males and  
16 32 IU/L in females. We calculated %changes of ( $\% \Delta$ ) markers during hospitalization as  
17  $(\text{discharge value} - \text{admission value}) / \text{admission value} \times 100$ .

18

1 **Supplemental Table 1. Correlation of PIIINP and P4NP 7S with clinical parameters**

| Variables                        | PIIINP      |          | P4NP 7S     |          |
|----------------------------------|-------------|----------|-------------|----------|
|                                  | Coefficient | <i>P</i> | Coefficient | <i>P</i> |
| T-Bil, mg/dl                     | -0.2        | 0.0001   | 0.4         | <0.0001  |
| AST, U/L                         | -0.12       | 0.016    | 0.28        | <0.0001  |
| ALP, U/L                         | 0.073       | 0.16     | 0.16        | 0.002    |
| γ-GTP, U/L                       | -0.14       | 0.011    | 0.41        | <0.0001  |
| Albumin, g/dl                    | -0.1        | 0.059    | 0.045       | 0.38     |
| eGFR, mL/min/1.73 m <sup>2</sup> | -0.44       | <0.0001  | -0.07       | 0.0063   |
| BNP, pg/ml                       | 0.095       | 0.071    | 0.25        | <0.0001  |
| PIIINP, U/mL                     | N/A         |          | 0.24        | <0.0001  |
| P4NP 7S, ng/mL                   | 0.24        | <0.0001  | N/A         |          |

2 ALP, Alkaline phosphatase; AST, aspartate aminotransferase; BNP, brain natriuretic peptide;

3 eGFR, estimated glomerular filtration rate; γ-GTP, γ-glutamyltransferase; PIIINP, N-terminal

4 propeptide of procollagen type III; P4NP 7S, 7S domain of the collagen type IV N-terminal

5 propeptide; T-Bil, total bilirubin.

6

7

1 **Supplemental Table 2. Univariate and multivariate COX analyses of the 365-day**  
 2 **incidence of cardiac death and admission for HF**

| Variable                                       | Unadjusted HR<br>(95%CI) | <i>P</i> | Adjusted HR<br>(95%CI)  | <i>P</i>    | Adjusted HR<br>(95%CI)  | <i>P</i>    |
|------------------------------------------------|--------------------------|----------|-------------------------|-------------|-------------------------|-------------|
|                                                |                          |          | Model 1                 |             | Model 2                 |             |
| Age (per 1 year)                               | 1.02 (1.00-1.04)         | 0.04     | 1.01 (0.99-1.03)        | 0.44        | 1.01 (0.99-1.03)        | 0.2         |
| Male                                           | 1.14 (0.79-1.66)         | 0.48     | 1.39 (0.94-2.05)        | 0.1         | 1.37 (0.93-2.02)        | 0.11        |
| EF <40%                                        | 0.84 (-.57-1.22)         | 0.36     | 1.02 (0.68-1.52)        | 0.9         | 1.04 (0.69-1.55)        | 0.86        |
| eGFR (per 1<br>mL/min/1.73<br>m <sup>2</sup> ) | 0.97 (0.96-0.98)         | <0.001   | 0.97 (0.96-0.98)        | <0.001      | 0.97 (0.96-0.98)        | <0.001      |
| PIIINP (high<br>versus low)                    | 1.19 (0.83-1.73)         | 0.34     | <b>0.78 (0.52-1.17)</b> | <b>0.23</b> | -                       |             |
| P4NP 7S (high<br>versus low)                   | 1.20 (0.83-1.73)         | 0.34     | -                       |             | <b>1.50 (1.02-2.21)</b> | <b>0.04</b> |

3 EF, ejection fraction; HF, heart failure; HR, hazard ratio

4

**Supplemental Table 3. Crude and adjusted HR associated with abnormal****LFTs for cardiac death and admission for HF**

|               | Unadjusted HR (95% CI) | <i>P</i> | Adjusted HR (95% CI) | <i>P</i> |
|---------------|------------------------|----------|----------------------|----------|
| T-Bil         | 1.26 (0.44–2.78)       | 0.63     | 1.58 (0.55–3.57)     | 0.36     |
| AST           | 0.72 (0.42–1.15)       | 0.17     | 0.86 (0.50–1.40)     | 0.56     |
| ALP           | 1.17 (0.73–1.79)       | 0.51     | 1.37 (0.86–2.12)     | 0.18     |
| $\gamma$ -GTP | 0.70 (0.45–1.05)       | 0.08     | 0.89 (0.56–1.39)     | 0.62     |

- 1 In the multivariable Cox proportional hazards models, age, male, ejection fraction (EF) <40%,
- 2 and estimated glomerular filtration rate (eGFR), were incorporated as risk-adjusting variables.
- 3 ALP, alkaline phosphatase; AST, aspartate aminotransferase;  $\gamma$ -GTP,  $\gamma$ -glutamyltransferase; T-
- 4 Bil, total bilirubin.

- 1 **Supplemental Table 4. Difference in markers at discharge and %Δmarkers during hospitalization between the patients**
- 2 **with and without 90-day events**

|         | Markers at discharge                        |                  |          | %Δmarkers                                   |                     |          |
|---------|---------------------------------------------|------------------|----------|---------------------------------------------|---------------------|----------|
|         | 90-day cardiac death and HF hospitalization |                  | <i>P</i> | 90-day cardiac death and HF hospitalization |                     | <i>P</i> |
|         | No                                          | Yes              |          | No                                          | Yes                 |          |
| T-Bil   | 0.6 (0.5–0.9)                               | 0.7 (0.5–0.9)    | 0.43     | -20.0% (-37.5–0)                            | -22.2% (-38.7–1.8)  | 0.84     |
| AST     | 22 (17–29)                                  | 23 (17–28)       | 0.68     | -29.0% (-88.6–0)                            | -12.0% (-42.2–13.2) | 0.0037   |
| ALP     | 237 (195–303)                               | 225 (171–309)    | 0.31     | -7.1% (-18.9–5.3)                           | -1.8% (-17.1–11.5)  | 0.31     |
| γ-GTP   | 33 (19–67)                                  | 26 (17–87)       | 0.50     | -10.4% (-29.0–9.1)                          | -3.8% (-18.9–11.6)  | 0.09     |
| PIIINP  | 0.71 (0.57–0.93)                            | 0.72 (0.61–0.90) | 0.52     | -0.5% (-12.9–16.4)                          | -5.1% (-17.9–10.0)  | 0.13     |
| P4NP 7S | 5.0 (4–6.4)                                 | 5.6 (4.4–7.1)    | 0.042    | -16.1% (-27.1–5.4)                          | -11.5% (-26.1–3.5)  | 0.053    |

- 1 ALP, alkaline phosphatase; AST, aspartate aminotransferase;  $\gamma$ -GTP,  $\gamma$ -glutamyltransferase; HF, heart failure; PIIINP, N-terminal propeptide of
- 2 procollagen type III; P4NP 7S, 7S domain of the collagen type IV N-terminal propeptide; T-Bil, total bilirubin.
- 3
- 4

## 1 Supplemental Figure 1

2 A

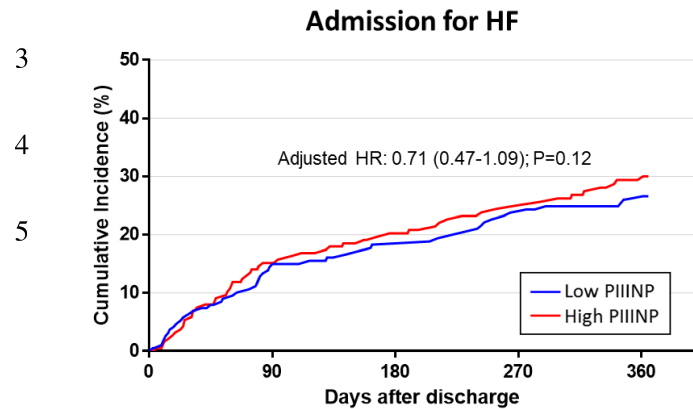

| Interval                 | 0 day | 90 days | 180 days | 365 days |
|--------------------------|-------|---------|----------|----------|
| <b>Low PIIINP</b>        |       |         |          |          |
| N of patients at risk    | 193   | 158     | 148      | 127      |
| N of patients with event |       | 28      | 34       | 49       |
| Cumulative incidence     |       | 15.0%   | 18.3%    | 26.6%    |
| <b>High PIIINP</b>       |       |         |          |          |
| N of patients at risk    | 191   | 152     | 137      | 109      |
| N of patients with event |       | 28      | 37       | 53       |
| Cumulative incidence     |       | 15.2%   | 20.3%    | 30.0%    |

B

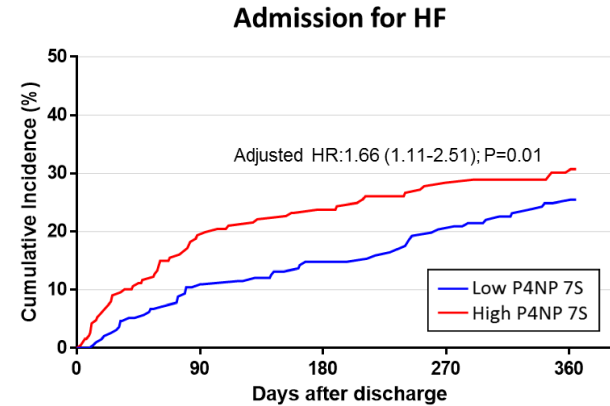

| Interval                 | 0 day | 90 days | 180 days | 365 days |
|--------------------------|-------|---------|----------|----------|
| <b>Low P4NP 7S</b>       |       |         |          |          |
| N of patients at risk    | 200   | 167     | 154      | 126      |
| N of patients with event |       | 21      | 28       | 47       |
| Cumulative incidence     |       | 11.0%   | 14.8%    | 25.5%    |
| <b>High P4NP 7S</b>      |       |         |          |          |
| N of patients at risk    | 190   | 147     | 136      | 115      |
| N of patients with event |       | 36      | 44       | 56       |
| Cumulative incidence     |       | 19.4%   | 23.8%    | 30.8%    |



1 C

2

3

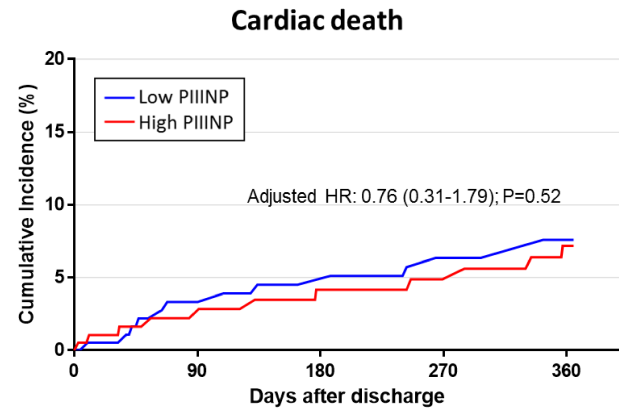

| Interval                 | 0 day | 90 days | 180 days | 365 days |
|--------------------------|-------|---------|----------|----------|
| <b>Low PIIINP</b>        |       |         |          |          |
| N of patients at risk    | 193   | 165     | 158      | 143      |
| N of patients with event |       | 6       | 8        | 13       |
| Cumulative incidence     |       | 3.3%    | 4.5%     | 7.6%     |
| <b>High PIIINP</b>       |       |         |          |          |
| N of patients at risk    | 191   | 152     | 137      | 109      |
| N of patients with event |       | 4       | 7        | 11       |
| Cumulative incidence     |       | 2.8%    | 4.2%     | 7.2%     |

D

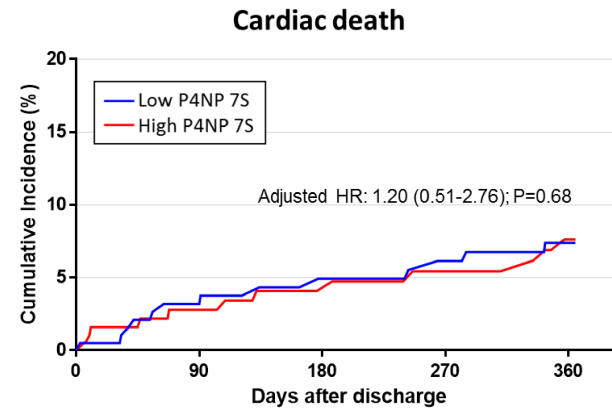

| Interval                 | 0 day | 90 days | 180 days | 365 days |
|--------------------------|-------|---------|----------|----------|
| <b>Low P4NP 7S</b>       |       |         |          |          |
| N of patients at risk    | 200   | 167     | 154      | 126      |
| N of patients with event |       | 6       | 9        | 13       |
| Cumulative incidence     |       | 3.2%    | 4.9%     | 7.4%     |
| <b>High P4NP 7S</b>      |       |         |          |          |
| N of patients at risk    | 190   | 147     | 136      | 115      |
| N of patients with event |       | 5       | 7        | 12       |
| Cumulative incidence     |       | 2.8%    | 4.1%     | 7.6%     |

1 E

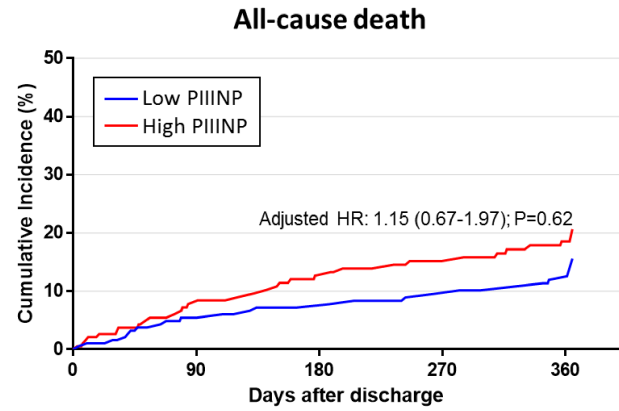

| Interval                 | 0 day | 90 days | 180 days | 365 days |
|--------------------------|-------|---------|----------|----------|
| <b>Low PIIINP</b>        |       |         |          |          |
| N of patients at risk    | 193   | 165     | 158      | 143      |
| N of patients with event |       | 11      | 14       | 28       |
| Cumulative incidence     |       | 6.0%    | 7.7%     | 16.1%    |
| <b>High PIIINP</b>       |       |         |          |          |
| N of patients at risk    | 191   | 155     | 142      | 115      |
| N of patients with event |       | 15      | 23       | 35       |
| Cumulative incidence     |       | 8.3%    | 13.1%    | 21.1%    |

F

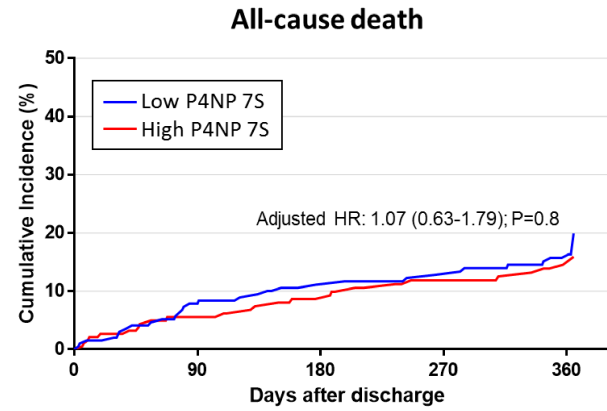

| Interval                 | 0 day | 90 days | 180 days | 365 days |
|--------------------------|-------|---------|----------|----------|
| <b>Low P4NP 7S</b>       |       |         |          |          |
| N of patients at risk    | 200   | 170     | 160      | 138      |
| N of patients with event |       | 16      | 22       | 37       |
| Cumulative incidence     |       | 8.3%    | 11.6%    | 20.4%    |
| <b>High P4NP 7S</b>      |       |         |          |          |
| N of patients at risk    | 190   | 155     | 145      | 125      |
| N of patients with event |       | 11      | 16       | 27       |
| Cumulative incidence     |       | 6.1%    | 9.1%     | 16.4%    |

1 **Supplemental Figure Legends**

2 **Supplemental Figure 1. The Kaplan–Meier curves for secondary outcome measures**  
3 **across PIIINP (A, C and E) and P4NP 7S (B, D and F).**

4 The secondary outcome measures were defined as admission for HF (A and B), cardiac death  
5 (C and D) and all-cause death (E and F). HF, heart failure; HR, hazard ratio; PIIINP, N-terminal  
6 propeptide of procollagen III; P4NP 7S, 7S domain of the collagen type IV N-terminal  
7 propeptide.

8

9

10

11

12

13

14

15
